# Supplementary material
Source: Springer Nature journal article supplement (https://www.springermedizin.de/resource/supplementary/13058_2012_3227_MOESM5_ESM.pdf/9703542)

**A**

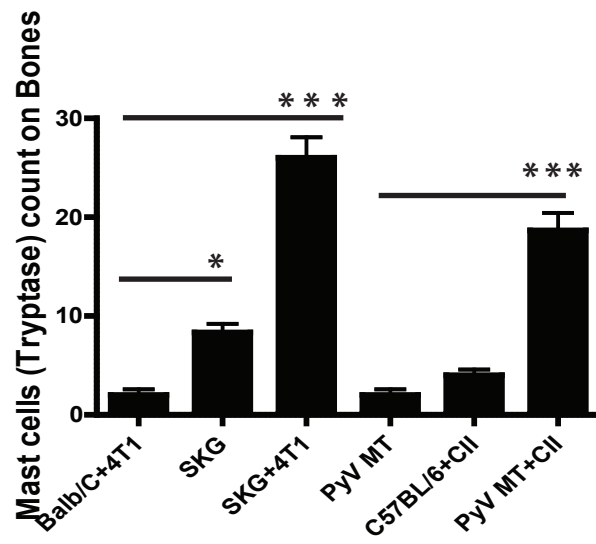

**Mast cells (Tryptase) on bones (400X)**

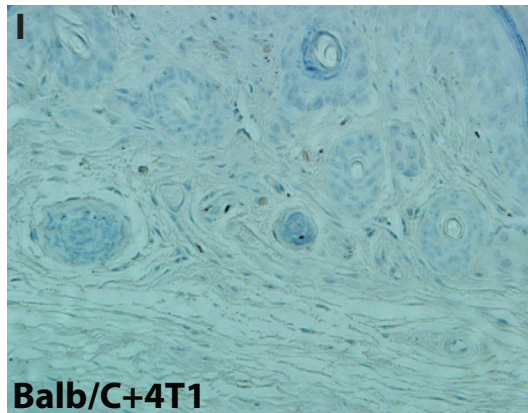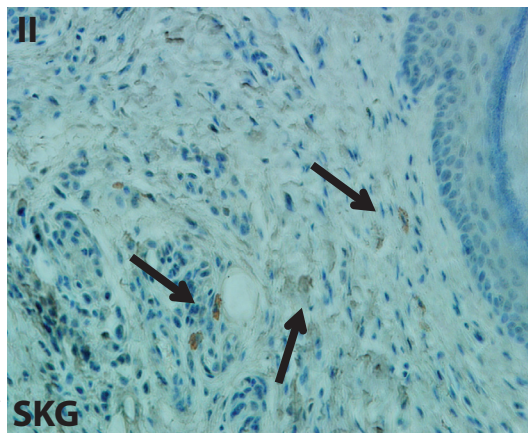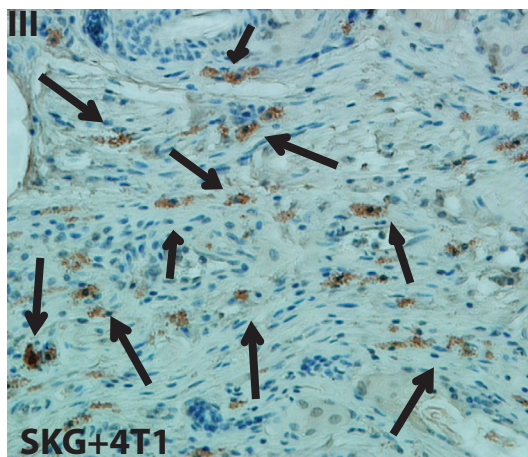

**Mast cells (Tryptase) on bones (400X)**

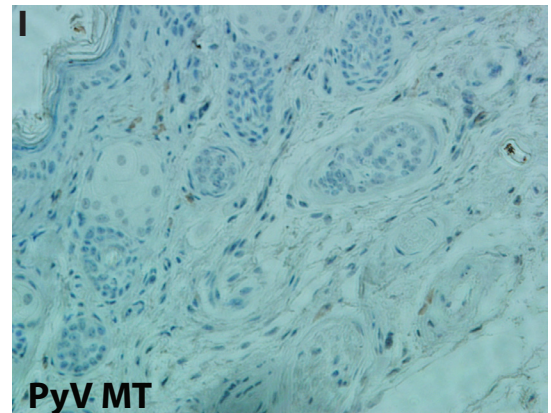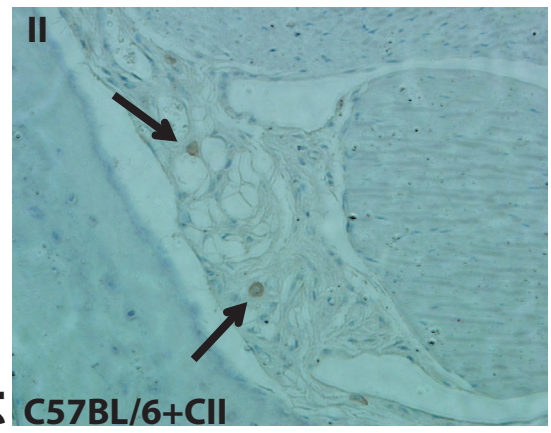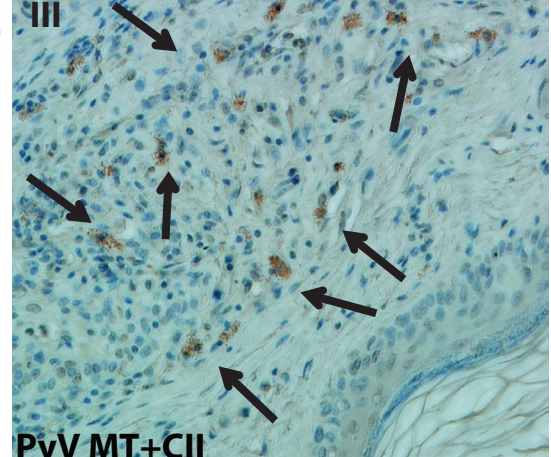

Supplement: MOESM5 [file 9703542]
